# Supplementary material for: Nucleophilic substitution in ionizable Fischer thiocarbene complexes: steric effect of the alkyl substituent on the heteroatom
Source: Royal Society of Chemistry journal article supplement (doi:10.1039/c4dt03618b), 2015-01-01
Supplement: c4dt03618b1.pdf [file c4dt03618b1.pdf]

**Supporting information of the article entitled:  
Nucleophilic Substitution in Ionizable Fischer Thiocarbene  
Complexes: Steric Effect of the Alkyl Substituent on the  
Heteroatom.**

*Diego M. Andrada,<sup>†</sup> Martin E. Zoloff Michoff,<sup>‡§</sup> Rita H. de Rossi<sup>1</sup> and Alejandro M.  
Granados<sup>1,\*</sup>*

INFIQC, CONICET and, Facultad de Ciencias Químicas, Universidad Nacional de  
Córdoba, Ciudad Universitaria X5000HUA, Córdoba, Argentina. <sup>§</sup> Departamento de  
Matemática y Física, <sup>1</sup> Departamento de Química Orgánica

ale@fcq.unc.edu.ar

Present Address:

<sup>†</sup> Fachbereich Chemie, Philipps-Universität Marburg, Hans-Meerwein-Straße, 35032-  
Marburg, Germany.

<sup>‡</sup> Lehrstuhl für Theoretische Chemie, Ruhr-Universität Bochum, Universitätsstraße 150,  
44780-Bochum, Germany.

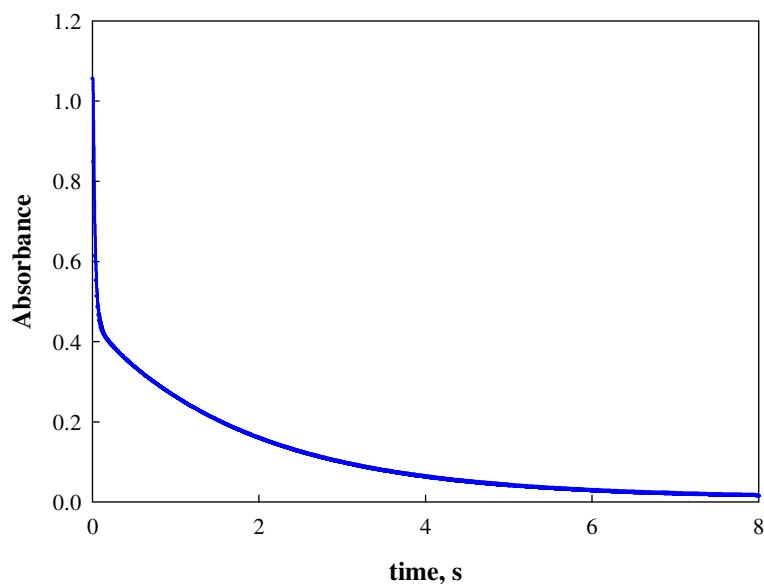

**Figure S1.** Kinetic trace (at  $\lambda = 335$  nm) for the reaction of **4W-cHex** with morpholine in 50 % MeCN- 50% water at 25 °C. Conditions:  $[4W-cHex] = 1.0 \times 10^{-4}$ ,  $[Morph]_{Total} = 1.25 \times 10^{-2}$  M,  $pH = 8.70$  and ionic strength = 0.1 M (KCl).

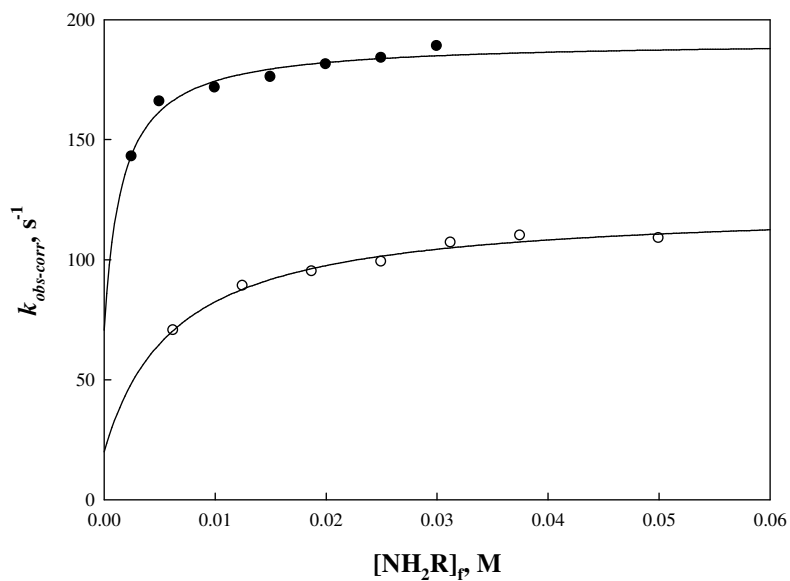

**Figure S2** Plot of  $k_{obs-corr}$  vs.  $[RNH_2]_f$  for the reaction of **4Cr-nBu** with: (●) benzylamine,  $pH = 9.12$ ; (○) furfurylamine,  $pH = 8.58$ , ionic strength= 0.1 M (KCl), 25 °C.

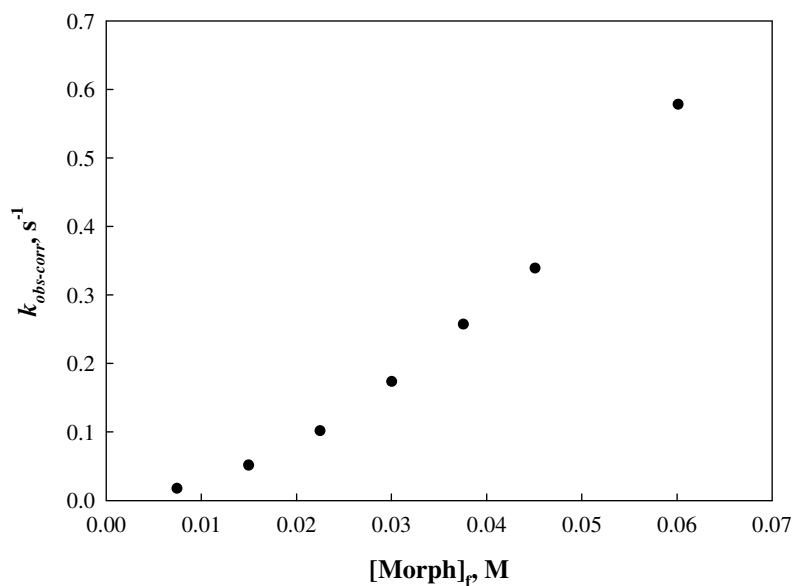

**Figure S3.** Plot of  $k_{obs-corr}$  vs.  $[Morph]_f$  for the reaction between morpholine and **4W-iPr** in 50% MeCN – 50% Water. Conditions:  $[4W-iPr] = 1.0 \times 10^{-4}$  M,  $pH = 8.88$ , ionic strength = 0.1 M (KCl) and  $T = 25^\circ$  C.

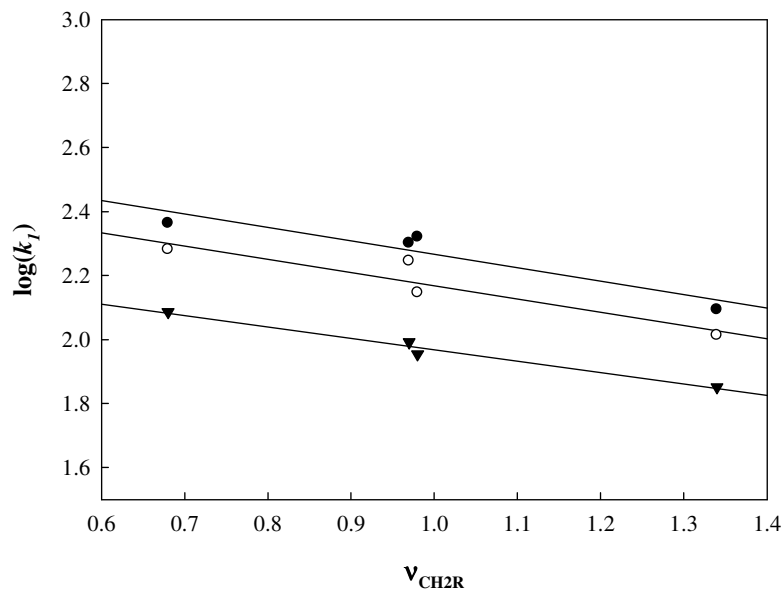

**Figure S4.** Plot of  $\log(k_f)$  vs.  $\nu_{CH2R}$  for the reaction of **4Cr-R** with (●) *n*-butylamine, (○) benzylamine and (▼) furfurylamine in 50 % MeCN – 50% water at  $25^\circ$  C and Ionic strength = 0.1 M (KCl).

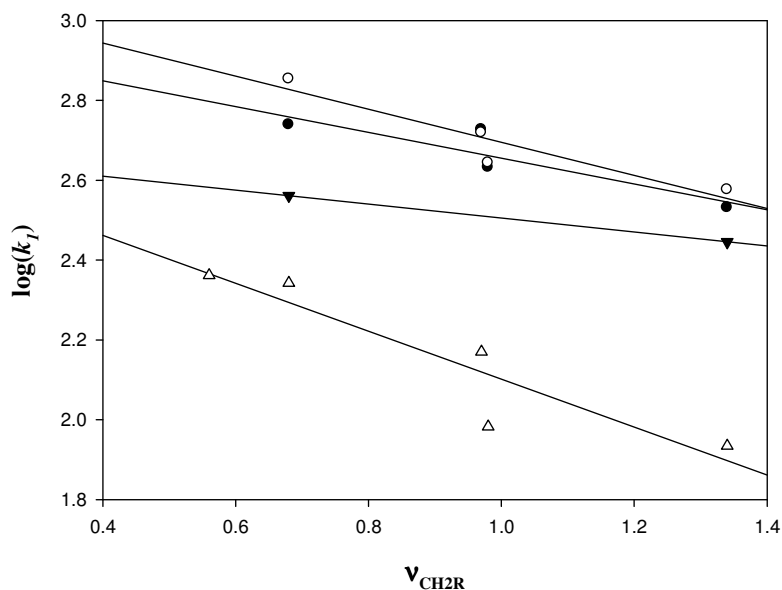

**Figure S5.** Plot of  $\log(k_1)$  vs.  $v_{\text{CH}_2\text{R}}$  for the reaction of **4W-R** with ( $\bullet$ ) 2-methoxyethylamine, ( $\circ$ ) benzylamine, ( $\blacktriangledown$ ) furfurylamine and ( $\triangle$ ) glycine ethyl ester in 50 % MeCN – 50% water at 25 °C and ionic strength = 0.1 M (KCl).

**Table S1.** Summary of the  $\psi$  values of the nucleophilic attachment in the aminolysis reactions of **4M-R** Fischer carbene complexes in 50% MeCN-50% Water at 25 °C.<sup>a</sup>

|   | Reactant                                                | Nucleophiles         | $\psi$           |
|---|---------------------------------------------------------|----------------------|------------------|
| 1 | $(\text{CO})_5\text{Cr}=\text{C}(\text{SR})\text{CH}_3$ | <i>n</i> -butylamine | $-0.42 \pm 0.08$ |
| 2 | $(\text{CO})_5\text{Cr}=\text{C}(\text{SR})\text{CH}_3$ | Benzylamine          | $-0.41 \pm 0.08$ |
| 3 | $(\text{CO})_5\text{Cr}=\text{C}(\text{SR})\text{CH}_3$ | Furfurylamine        | $-0.36 \pm 0.03$ |
| 4 | $(\text{CO})_5\text{W}=\text{C}(\text{SR})\text{CH}_3$  | <i>n</i> -butylamine | $-0.11^b$        |
| 5 | $(\text{CO})_5\text{W}=\text{C}(\text{SR})\text{CH}_3$  | 2-methoxyethylamine  | $-0.32 \pm 0.08$ |
| 6 | $(\text{CO})_5\text{W}=\text{C}(\text{SR})\text{CH}_3$  | Benzylamine          | $-0.42 \pm 0.08$ |
| 7 | $(\text{CO})_5\text{W}=\text{C}(\text{SR})\text{CH}_3$  | Furfurylamine        | $-0.17 \pm 0.07$ |
| 8 | $(\text{CO})_5\text{W}=\text{C}(\text{SR})\text{CH}_3$  | Glycine ethyl ester  | $-0.57 \pm 0.05$ |

<sup>a</sup> Ionic strength = 0.1 (KCl). <sup>b</sup> Two points.

**Table S2.** Reaction of **4W-nBu** with Morpholine in 50% MeCN- 50% water at 25 °C.<sup>a</sup>

| [Buffer], M | [Morph] <sub>f</sub> , M | $k_{obs}$ , s <sup>-1</sup> <sup>b</sup> | $k_{A-corr}$ , M <sup>-1</sup> s <sup>-1</sup> |
|-------------|--------------------------|------------------------------------------|------------------------------------------------|
| 0.0250      | 0.0151                   | 0.0987 ± 0.0005                          | 18.49                                          |
| 0.0375      | 0.0226                   | 0.1964 ± 0.0003                          | 24.53                                          |
| 0.0500      | 0.0301                   | 0.354 ± 0.001                            | 33.15                                          |
| 0.0625      | 0.0376                   | 0.563 ± 0.003                            | 42.18                                          |
| 0.7500      | 0.0452                   | 0.766 ± 0.003                            | 47.83                                          |
| 0.1000      | 0.0602                   | 1.234 ± 0.003                            | 57.79                                          |

<sup>a</sup> Conditions: ionic strength = 0.1 M (KCl), [**4W-nBu**] = 1.0 × 10<sup>-4</sup> M, pH = 8.88. <sup>b</sup> Determined with a *stopped-flow* machine monitoring at 436 nm and 335 nm.

**Table S3.** Reaction of **4W-nBu** with Morpholine in 50% MeCN- 50% water at 25 °C varying the pH.<sup>a</sup>

| pH     | [HO <sup>-</sup> ], M | $k_{obs}$ , s <sup>-1</sup> | $k_{A-corr}$ , M <sup>-1</sup> s <sup>-1</sup> |
|--------|-----------------------|-----------------------------|------------------------------------------------|
| 9.588  | 2.50 10 <sup>-6</sup> | 0.126 ± 0.001               | 146.43                                         |
| 9.667  | 3.00 10 <sup>-6</sup> | 0.1168 ± 0.0002             | 157.13                                         |
| 9.792  | 4.00 10 <sup>-6</sup> | 0.1094 ± 0.0007             | 187.54                                         |
| 9.889  | 5.00 10 <sup>-6</sup> | 0.0926 ± 0.0004             | 193.02                                         |
| 10.065 | 7.50 10 <sup>-6</sup> | 0.0755 ± 0.0003             | 227.31                                         |
| 10.190 | 1.00 10 <sup>-5</sup> | 0.0650 ± 0.0002             | 256.02                                         |
| 10.366 | 1.50 10 <sup>-5</sup> | 0.0514 ± 0.0002             | 297.82                                         |
| 10.491 | 2.00 10 <sup>-5</sup> | 0.0457 ± 0.0002             | 349.70                                         |
| 10.588 | 2.50 10 <sup>-5</sup> | 0.03998 ± 0.00004           | 380.26                                         |
| 10.667 | 3.00 10 <sup>-5</sup> | 0.0407 ± 0.0003             | 462.53                                         |
| 10.792 | 4.00 10 <sup>-5</sup> | 0.0342 ± 0.0003             | 515.75                                         |
| 10.889 | 5.00 10 <sup>-5</sup> | 0.0316 ± 0.0003             | 594.05                                         |
| 11.065 | 7.50 10 <sup>-5</sup> | 0.0255 ± 0.0001             | 716.09                                         |
| 11.190 | 1.00 10 <sup>-4</sup> | 0.0204 ± 0.0002             | 762.43                                         |

<sup>a</sup> Conditions: ionic strength = 0.1 M (KCl), [**4W-nBu**] = 1.0 × 10<sup>-4</sup> M, [morph] = 0.01 M and [TEA] = 0.01M. <sup>b</sup> Determined with a *stopped-flow* machine monitoring at 436 nm and 335 nm.

**Table S4.** Reaction of **4W-nBu** with Morpholine in 50% MeCN- 50% water at 25 °C varying the concentration of the external TEA buffer.<sup>a</sup>

| [TEA], M | $k_{obs}$ , s <sup>-1</sup> | $k_{A-corr}$ , M <sup>-1</sup> s <sup>-1</sup> |
|----------|-----------------------------|------------------------------------------------|
| 0.001    | 0.0243 ± 0.0001             | 353.67                                         |
| 0.002    | 0.025197 ± 0.000006         | 366.72                                         |
| 0.003    | 0.0263 ± 0.0001             | 382.78                                         |
| 0.004    | 0.0267 ± 0.0001             | 388.60                                         |
| 0.005    | 0.02673 ± 0.00005           | 389.04                                         |
| 0.007    | 0.02952 ± 0.00006           | 429.65                                         |
| 0.008    | 0.02964 ± 0.00009           | 431.39                                         |
| 0.009    | 0.02962 ± 0.00009           | 431.10                                         |
| 0.010    | 0.02918 ± 0.00005           | 424.70                                         |
| 0.015    | 0.03250 ± 0.00009           | 473.02                                         |
| 0.020    | 0.0341 ± 0.0002             | 496.31                                         |
| 0.025    | 0.03294 ± 0.00004           | 479.42                                         |
| 0.030    | 0.0354 ± 0.0002             | 515.23                                         |
| 0.040    | 0.0338 ± 0.0002             | 491.94                                         |
| 0.050    | 0.03469 ± 0.00005           | 504.89                                         |

<sup>a</sup> Conditions: ionic strength = 0.1 M (KCl), [4W-nBu] = 1.0 × 10<sup>-4</sup> M, [Morph] = 0.01 M, pH = 10.78. <sup>b</sup> Determined with a *stopped-flow* machine monitoring at 436 nm and 335 nm.

**Table S5.** Reaction of **4W-nBu** with Glycinethylester in 50% MeCN- 50% water at 25 °C.<sup>a</sup>

| [Buffer], M | [Nu] <sub>f</sub> , M | $k_{obs}$ , s <sup>-1</sup> <sup>b</sup> |
|-------------|-----------------------|------------------------------------------|
| 0.0125      | 0.00625               | 0.425 ± 0.001                            |
| 0.0250      | 0.01250               | 1.092 ± 0.006                            |
| 0.0375      | 0.01875               | 1.739 ± 0.009                            |
| 0.0500      | 0.02500               | 2.524 ± 0.008                            |
| 0.0625      | 0.03125               | 3.42 ± 0.01                              |
| 0.0750      | 0.03750               | 4.59 ± 0.03                              |
| 0.1000      | 0.05000               | 6.41 ± 0.05                              |

<sup>a</sup> Conditions: ionic strength = 0.1 M (KCl), [4W-nBu] = 1.0 × 10<sup>-4</sup> M, pH = 7.43. <sup>b</sup> Determined with a *stopped-flow* machine monitoring at 436 nm and 335 nm.

**Table S6.** Reaction of **4W-nBu** with Furfurylamine in 50% MeCN- 50% water at 25 °C.<sup>a</sup>

| [Buffer], M | [Nu] <sub>f</sub> , M | $k_{obs}$ , s <sup>-1</sup> <sup>b</sup> |
|-------------|-----------------------|------------------------------------------|
| 0.0125      | 0.00625               | 1.42 ± 0.05                              |
| 0.0250      | 0.01250               | 2.79 ± 0.01                              |
| 0.0375      | 0.01875               | 4.14 ± 0.01                              |
| 0.0500      | 0.02500               | 5.45 ± 0.02                              |
| 0.0625      | 0.03125               | 6.56 ± 0.05                              |
| 0.0750      | 0.03750               | 7.62 ± 0.02                              |
| 0.1000      | 0.05000               | 9.80 ± 0.05                              |

<sup>a</sup> Conditions: ionic strength = 0.1 M (KCl), [4W-*n*Bu] = 1.0 × 10<sup>-4</sup> M, pH = 8.58. <sup>b</sup> Determined with a stopped-flow machine monitoring at 436 nm and 335 nm.

**Table S7.** Reaction of 4W-*n*Bu with Benzylamine in 50% MeCN- 50% water at 25 °C.<sup>a</sup>

| [Buffer], M | [Nu] <sub>f</sub> , M | $k_{obs}$ , s <sup>-1</sup> <sup>b</sup> |
|-------------|-----------------------|------------------------------------------|
| 0.0125      | 0.00625               | 0.999 ± 0.002                            |
| 0.0250      | 0.01250               | 2.51 ± 0.02                              |
| 0.0375      | 0.01875               | 3.45 ± 0.04                              |
| 0.0500      | 0.02500               | 4.55 ± 0.04                              |
| 0.0625      | 0.03125               | 5.59 ± 0.06                              |
| 0.0750      | 0.03750               | 6.55 ± 0.07                              |
| 0.1000      | 0.05000               | 8.71 ± 0.07                              |

<sup>a</sup> Conditions: ionic strength = 0.1 M (KCl), [4W-*n*Bu] = 1.0 × 10<sup>-4</sup> M, pH = 9.12. <sup>b</sup> Determined with a stopped-flow machine monitoring at 436 nm and 335 nm.

**Table S8.** Reaction of 4W-*n*Bu with 2-Methoxyethylamine in 50% MeCN- 50% water at 25 °C.<sup>a</sup>

| [Buffer], M | [Nu] <sub>f</sub> , M   | $k_{obs}$ , s <sup>-1</sup> <sup>b</sup> |
|-------------|-------------------------|------------------------------------------|
| 0.00625     | 3.1250 10 <sup>-3</sup> | 0.268 ± 0.003                            |
| 0.01250     | 6.2500 10 <sup>-3</sup> | 0.490 ± 0.008                            |
| 0.01875     | 9.3750 10 <sup>-3</sup> | 0.98 ± 0.02                              |
| 0.02500     | 0.0125                  | 1.120 ± 0.009                            |
| 0.03125     | 0.0156                  | 1.35 ± 0.02                              |
| 0.03750     | 0.0188                  | 1.61 ± 0.02                              |
| 0.05000     | 0.0250                  | 2.00 ± 0.03                              |

<sup>a</sup> Conditions: ionic strength = 0.1 M (KCl), [4W-*n*Bu] = 1.0 × 10<sup>-4</sup> M, pH = 9.39. <sup>b</sup> Determined with a *stopped-flow* machine monitoring at 436 nm and 335 nm.

**Table S9.** Reaction of 4W-*c*Hex with Morpholine in 50% MeCN- 50% water at 25 °C.<sup>a</sup>

| [Buffer], M | [Morph] <sub>f</sub> , M | <i>k</i> <sub>obs</sub> , s <sup>-1</sup> | <i>k</i> <sub>A,corr</sub> , M <sup>-1</sup> s <sup>-1</sup> |
|-------------|--------------------------|-------------------------------------------|--------------------------------------------------------------|
| 0.0250      | 0.0151                   | 0.0512 ± 0.0004                           | 7.48                                                         |
| 0.0375      | 0.0226                   | 0.116 ± 0.0008                            | 11.30                                                        |
| 0.0500      | 0.0301                   | 0.202 ± 0.002                             | 14.76                                                        |
| 0.0625      | 0.0376                   | 0.3150 ± 0.0003                           | 18.41                                                        |
| 0.7500      | 0.0452                   | 0.421 ± 0.001                             | 20.51                                                        |
| 0.1000      | 0.0602                   | 0.725 ± 0.002                             | 26.49                                                        |

<sup>a</sup> Conditions: ionic strength = 0.1 M (KCl), [4W-*c*Hex] = 1.0 × 10<sup>-4</sup> M, pH = 8.88. <sup>b</sup> Determined with a *stopped-flow* machine monitoring at 436 nm and 335 nm.

**Table S10.** Reaction of 4W-*c*Hex with Morpholine in 50% MeCN- 50% water at 25 °C varying the pH.<sup>a</sup>

| pH     | [HO <sup>-</sup> ], M | <i>k</i> <sub>obs</sub> , s <sup>-1</sup> | <i>k</i> <sub>A,corr</sub> , M <sup>-1</sup> s <sup>-1</sup> |
|--------|-----------------------|-------------------------------------------|--------------------------------------------------------------|
| 9.588  | 2.50 10 <sup>-6</sup> | 0.1035 ± 0.0005                           | 83.44                                                        |
| 9.667  | 3.00 10 <sup>-6</sup> | 0.09379 ± 0.00007                         | 86.89                                                        |
| 9.792  | 4.00 10 <sup>-6</sup> | 0.0870 ± 0.0002                           | 101.73                                                       |
| 9.889  | 5.00 10 <sup>-6</sup> | 0.0706 ± 0.0001                           | 99.78                                                        |
| 10.065 | 7.50 10 <sup>-6</sup> | 0.0608 ± 0.0002                           | 123.09                                                       |
| 10.190 | 1.00 10 <sup>-5</sup> | 0.04997 ± 0.00005                         | 131.79                                                       |
| 10.366 | 1.50 10 <sup>-5</sup> | 0.0427 ± 0.0002                           | 164.95                                                       |
| 10.491 | 2.00 10 <sup>-5</sup> | 0.0352 ± 0.0002                           | 179.17                                                       |
| 10.588 | 2.50 10 <sup>-5</sup> | 0.0314 ± 0.00008                          | 198.40                                                       |
| 10.667 | 3.00 10 <sup>-5</sup> | 0.0290 ± 0.0005                           | 218.73                                                       |
| 10.792 | 4.00 10 <sup>-5</sup> | 0.02565 ± 0.0005                          | 256.44                                                       |
| 10.889 | 5.00 10 <sup>-5</sup> | 0.023550 ± 0.00008                        | 293.30                                                       |
| 11.065 | 7.50 10 <sup>-5</sup> | 0.01980 ± 0.0001                          | 368.03                                                       |
| 11.190 | 1.00 10 <sup>-4</sup> | 0.016040 ± 0.00006                        | 396.62                                                       |

<sup>a</sup> Conditions: ionic strength = 0.1 M (KCl), [4W-*c*Hex] = 1.0 × 10<sup>-4</sup> M, [morph] = 0.01 M and [TEA] = 0.01M. <sup>b</sup> Determined with a *stopped-flow* machine monitoring at 436 nm and 335 nm.



**Table S11.** Reaction of **4W-cHex** with Morpholine in 50% MeCN- 50% water at 25 °C varying the concentration of the external TEA buffer.<sup>a</sup>

| [TEA], M | $k_{obs}$ , s <sup>-1</sup> | $k_{A-corr}$ , M <sup>-1</sup> s <sup>-1</sup> |
|----------|-----------------------------|------------------------------------------------|
| 0.001    | 0.0224 ± 0.0004             | 216.16                                         |
| 0.002    | 0.0231 ± 0.0005             | 222.43                                         |
| 0.004    | 0.02300 ± 0.00003           | 221.56                                         |
| 0.005    | 0.02430 ± 0.00007           | 234.49                                         |
| 0.006    | 0.0248 ± 0.0001             | 239.32                                         |
| 0.007    | 0.02470 ± 0.00007           | 238.35                                         |
| 0.008    | 0.02520 ± 0.00005           | 243.18                                         |
| 0.009    | 0.02660 ± 0.00007           | 256.69                                         |
| 0.010    | 0.02660 ± 0.00005           | 256.98                                         |
| 0.015    | 0.02950 ± 0.00007           | 284.67                                         |
| 0.020    | 0.0319 ± 0.0002             | 307.83                                         |
| 0.025    | 0.0330 ± 0.0001             | 318.45                                         |
| 0.040    | 0.0368 ± 0.00006            | 355.12                                         |
| 0.050    | 0.03760 ± 0.00008           | 362.84                                         |
| 0.075    | 0.0371 ± 0.0003             | 358.01                                         |
| 0.100    | 0.03710 ± 0.00005           | 358.01                                         |

<sup>a</sup> Conditions: ionic strength = 0.1 M (KCl), [4W-cHex] = 1.0 × 10<sup>-4</sup> M, [Morph] = 0.01 M, pH = 10.78 and [morph] = 0.01. <sup>b</sup> Determined with a *stopped-flow* machine monitoring at 436 nm and 335 nm.

**Table S12.** Reaction of **4W-cHex** with Glycinethylester in 50% MeCN- 50% water at 25 °C.<sup>a</sup>

| [Buffer], M | [Nu] <sub>f</sub> , M | $k_{obs}$ , s <sup>-1</sup> <sup>b</sup> |
|-------------|-----------------------|------------------------------------------|
| 0.0125      | 0.00625               | 0.2997 ± 0.0004                          |
| 0.0250      | 0.01250               | 0.769 ± 0.001                            |
| 0.0375      | 0.01875               | 1.205 ± 0.003                            |
| 0.0500      | 0.02500               | 1.860 ± 0.009                            |
| 0.0625      | 0.03125               | 2.52 ± 0.02                              |
| 0.0750      | 0.03750               | 3.29 ± 0.02                              |
| 0.1000      | 0.05000               | 4.58 ± 0.02                              |

<sup>a</sup> Conditions: ionic strength = 0.1 M (KCl), [4W-cHex] = 1.0 × 10<sup>-4</sup> M, pH = 7.43. <sup>b</sup> Determined with a *stopped-flow* machine monitoring at 437 nm.

**Table S13.** Reaction of **4W-cHex** with Benzylamine in 50% MeCN- 50% water at 25 °C.<sup>a</sup>

| [Buffer], M | [Nu] <sub>f</sub> , M | <i>k</i> <sub>obs</sub> , s <sup>-1</sup> <sup>b</sup> |
|-------------|-----------------------|--------------------------------------------------------|
| 0.0125      | 0.00625               | 1.045 ± 0.003                                          |
| 0.0250      | 0.01250               | 2.21 ± 0.02                                            |
| 0.0375      | 0.01875               | 3.43 ± 0.01                                            |
| 0.0500      | 0.02500               | 4.43 ± 0.01                                            |
| 0.0625      | 0.03125               | 5.52 ± 0.05                                            |
| 0.0750      | 0.03750               | 6.47 ± 0.05                                            |
| 0.1000      | 0.05000               | 8.51 ± 0.02                                            |

<sup>a</sup> Conditions: ionic strength = 0.1 M (KCl), [**4W-cHex**] = 1.0 × 10<sup>-4</sup> M, pH = 9.12. <sup>b</sup> Determined with a *stopped-flow* machine monitoring at 436 nm and 335 nm.

**Table S14.** Reaction of **4W-cHex** with Methoxyethylamine in 50% MeCN- 50% water at 25 °C.<sup>a</sup>

| [Buffer], M | [Nu] <sub>f</sub> , M   | <i>k</i> <sub>obs</sub> , s <sup>-1</sup> <sup>b</sup> |
|-------------|-------------------------|--------------------------------------------------------|
| 0.00625     | 3.1250 10 <sup>-3</sup> | 0.278 ± 0.006                                          |
| 0.01250     | 6.2500 10 <sup>-3</sup> | 0.609 ± 0.005                                          |
| 0.01875     | 9.3750 10 <sup>-3</sup> | 0.959 ± 0.005                                          |
| 0.02500     | 0.0125                  | 1.36 ± 0.01                                            |
| 0.03125     | 0.0156                  | 1.726 ± 0.009                                          |
| 0.03750     | 0.0188                  | 2.011 ± 0.002                                          |
| 0.05000     | 0.0250                  | 2.62 ± 0.04                                            |

<sup>a</sup> Conditions: ionic strength = 0.1 M (KCl), [**4W-cHex**] = 1.0 × 10<sup>-4</sup> M, pH = 9.39. <sup>b</sup> Determined with a *stopped-flow* machine monitoring at 437 nm.

**Table S15.** Reaction of **4W-cHex** with Butylamine in 50% MeCN- 50% water at 25 °C.<sup>a</sup>

| [Buffer], M | [Nu] <sub>f</sub> , M | <i>k</i> <sub>obs</sub> , s <sup>-1</sup> <sup>b</sup> |
|-------------|-----------------------|--------------------------------------------------------|
| 0.0125      | 0.00625               | 0.124 ± 0.005                                          |
| 0.0250      | 0.01250               | 0.27 ± 0.02                                            |
| 0.0375      | 0.01875               | 0.434 ± 0.002                                          |
| 0.0500      | 0.02500               | 0.480 ± 0.009                                          |
| 0.0625      | 0.03125               | 0.5 ± 0.03                                             |
| 0.0750      | 0.03750               | 0.68 ± 0.04                                            |

0.1000

0.05000

1.04 ± 0.07

<sup>a</sup> Conditions: ionic strength = 0.1 M (KCl), [4W-cHex] = 1.0 × 10<sup>-4</sup> M, pH = 10.40. <sup>b</sup> Determined with a stopped-flow machine monitoring at 437 nm.

**Table S16.** Reaction of 4W-iPr with Morpholine in 50% MeCN- 50% water at 25 °C.<sup>a</sup>

| [Buffer], M | [Morph] <sub>f</sub> , M | $k_{obs}$ , s <sup>-1</sup> | $k_{A-corr}$ , M <sup>-1</sup> s <sup>-1</sup> |
|-------------|--------------------------|-----------------------------|------------------------------------------------|
| 0.0125      | 0.0075                   | 0.01650 ± 0.00006           | 5.37                                           |
| 0.0250      | 0.0151                   | 0.0505 ± 0.0002             | 8.22                                           |
| 0.0375      | 0.0226                   | 0.1006 ± 0.0003             | 10.91                                          |
| 0.0500      | 0.0301                   | 0.1723 ± 0.0004             | 14.02                                          |
| 0.0625      | 0.0376                   | 0.256 ± 0.001               | 16.66                                          |
| 0.7500      | 0.0452                   | 0.338 ± 0.001               | 18.34                                          |
| 0.1000      | 0.0602                   | 0.577 ± 0.004               | 23.47                                          |

<sup>a</sup> Conditions: ionic strength = 0.1 M (KCl), [4W-iPr] = 1.0 × 10<sup>-4</sup> M, pH = 8.88. <sup>b</sup> Determined with a stopped-flow machine monitoring at 436 nm and 335 nm.

**Table S17.** Reaction of 4W-iPr with Morpholine in 50% MeCN- 50% water at 25 °C varying the pH.<sup>a</sup>

| pH     | [HO <sup>-</sup> ], M   | $k_{obs}$ , s <sup>-1</sup> | $k_{A-corr}$ , M <sup>-1</sup> s <sup>-1</sup> |
|--------|-------------------------|-----------------------------|------------------------------------------------|
| 9.588  | 2.50 × 10 <sup>-6</sup> | 0.0694 ± 0.0002             | 65.68                                          |
| 9.667  | 3.00 × 10 <sup>-6</sup> | 0.0634 ± 0.0003             | 69.19                                          |
| 9.792  | 4.00 × 10 <sup>-6</sup> | 0.0583 ± 0.0002             | 80.68                                          |
| 9.889  | 5.00 × 10 <sup>-6</sup> | 0.0491 ± 0.0001             | 82.37                                          |
| 10.065 | 7.50 × 10 <sup>-6</sup> | 0.0412 ± 0.0001             | 99.42                                          |
| 10.190 | 1.00 × 10 <sup>-5</sup> | 0.0354 ± 0.0001             | 111.51                                         |
| 10.366 | 1.50 × 10 <sup>-5</sup> | 0.03128 ± 0.00001           | 144.62                                         |
| 10.491 | 2.00 × 10 <sup>-5</sup> | 0.026000 ± 0.0001           | 158.58                                         |
| 10.588 | 2.50 × 10 <sup>-5</sup> | 0.0253 ± 0.0002             | 191.67                                         |
| 10.667 | 3.00 × 10 <sup>-5</sup> | 0.0213 ± 0.0002             | 192.72                                         |
| 10.792 | 4.00 × 10 <sup>-5</sup> | 0.0182 ± 0.0002             | 218.39                                         |
| 10.889 | 5.00 × 10 <sup>-5</sup> | 0.0171 ± 0.0002             | 255.70                                         |
| 11.065 | 7.50 × 10 <sup>-5</sup> | 0.0143 ± 0.0002             | 319.27                                         |
| 11.190 | 1.00 × 10 <sup>-4</sup> | 0.01199 ± 0.00002           | 356.20                                         |

<sup>a</sup> Conditions: ionic strength = 0.1 M (KCl), [4W-*i*Pr] =  $1.0 \times 10^{-4}$  M, [morph] = 0.01 M and [TEA] = 0.01M. <sup>b</sup> Determined with a *stopped-flow* machine monitoring at 436 nm and 335 nm.

**Table S18.** Reaction of 4W-*i*Pr with Morpholine in 50% MeCN- 50% water at 25 °C varying the concentration of the external TEA buffer.<sup>a</sup>

| [TEA], M | $k_{obs}, s^{-1}$ | $k_{A-corr}, M^{-1} s^{-1}$ |
|----------|-------------------|-----------------------------|
| 0.001    | 0.01624 ± 0.00009 | 161.81                      |
| 0.002    | 0.01670 ± 0.00005 | 160.33                      |
| 0.003    | 0.01716 ± 0.00003 | 164.87                      |
| 0.004    | 0.01616 ± 0.00007 | 169.41                      |
| 0.005    | 0.01795 ± 0.00007 | 159.54                      |
| 0.007    | 0.01815 ± 0.00004 | 177.21                      |
| 0.008    | 0.0178 ± 0.0001   | 179.18                      |
| 0.009    | 0.0193 ± 0.0002   | 175.73                      |
| 0.010    | 0.0198 ± 0.0002   | 190.54                      |
| 0.015    | 0.02116 ± 0.00009 | 195.47                      |
| 0.020    | 0.02312 ± 0.00008 | 208.90                      |
| 0.025    | 0.02597 ± 0.00007 | 228.25                      |
| 0.030    | 0.02614 ± 0.00009 | 256.39                      |
| 0.040    | 0.02679 ± 0.00005 | 258.06                      |
| 0.050    | 0.0264 ± 0.0001   | 264.48                      |
| 0.075    | 0.02682 ± 0.00006 | 260.63                      |
| 0.100    | 0.02640 ± 0.00009 | 264.78                      |

<sup>a</sup> Conditions: ionic strength = 0.1 M (KCl), [4W-*i*Pr] =  $1.0 \times 10^{-4}$  M, [Morph] = 0.01 M, pH = 10.78. <sup>b</sup> Determined with a *stopped-flow* machine monitoring at 436 nm and 335 nm.

**Table S19.** Reaction of 4W-*i*Pr with Glycinethylester in 50% MeCN- 50% water at 25 °C.<sup>a</sup>

| [Buffer], M | [Nu] <sub>f</sub> , M | $k_{obs}, s^{-1}$ <sup>b</sup> |
|-------------|-----------------------|--------------------------------|
| 0.0125      | 0.00625               | 0.2722 ± 0.0006                |
| 0.0250      | 0.01250               | 0.6995 ± 0.0008                |
| 0.0375      | 0.01875               | 1.136 ± 0.003                  |
| 0.0500      | 0.02500               | 1.752 ± 0.002                  |

|        |         |               |
|--------|---------|---------------|
| 0.0625 | 0.03125 | 2.380 ± 0.001 |
| 0.0750 | 0.03750 | 2.98 ± 0.01   |
| 0.1000 | 0.05000 | 4.229 ± 0.008 |

<sup>a</sup> Conditions: ionic strength = 0.1 M (KCl), [4W-*i*Pr] = 1.0 × 10<sup>-4</sup> M, pH = 7.43. <sup>b</sup> Determined with a stopped-flow machine monitoring at 436 nm.

**Table S20.** Reaction of 4W-*i*Pr with Furfurylamine in 50% MeCN- 50% water at 25 °C.<sup>a</sup>

| [Buffer], M | [Nu] <sub>f</sub> , M | k <sub>obs</sub> , s <sup>-1</sup> <sup>b</sup> |
|-------------|-----------------------|-------------------------------------------------|
| 0.0125      | 0.00625               | 0.995 ± 0.005                                   |
| 0.0250      | 0.01250               | 2.146 ± 0.009                                   |
| 0.0375      | 0.01875               | 3.206 ± 0.008                                   |
| 0.0500      | 0.02500               | 4.46 ± 0.04                                     |
| 0.0625      | 0.03125               | 5.517 ± 0.009                                   |
| 0.0750      | 0.03750               | 6.46 ± 0.03                                     |
| 0.1000      | 0.05000               | 8.24 ± 0.02                                     |

<sup>a</sup> Conditions: ionic strength = 0.1 M (KCl), [4W-*i*Pr] = 1.0 × 10<sup>-4</sup> M, pH = 8.58. <sup>b</sup> Determined with a stopped-flow machine monitoring at 436 nm.

**Table S21.** Reaction of 4W-*i*Pr with Benzylamine in 50% MeCN- 50% water at 25 °C.<sup>a</sup>

| [Buffer], M | [Nu] <sub>f</sub> , M | k <sub>obs</sub> , s <sup>-1</sup> <sup>b</sup> |
|-------------|-----------------------|-------------------------------------------------|
| 0.0125      | 0.00625               | 0.560 ± 0.009                                   |
| 0.0250      | 0.01250               | 1.42 ± 0.02                                     |
| 0.0375      | 0.01875               | 2.12 ± 0.02                                     |
| 0.0500      | 0.02500               | 3.04 ± 0.04                                     |
| 0.0625      | 0.03125               | 3.50 ± 0.04                                     |
| 0.0750      | 0.03750               | 4.62 ± 0.05                                     |
| 0.1000      | 0.05000               | 6.06 ± 0.05                                     |

<sup>a</sup> Conditions: ionic strength = 0.1 M (KCl), [4W-*i*Pr] = 1.0 × 10<sup>-4</sup> M, pH = 9.12. <sup>b</sup> Determined with a stopped-flow machine monitoring at 436 nm.

**Table S22.** Reaction of 4W-*i*Pr with Methoxyethylamine in 50% MeCN- 50% water at 25 °C.<sup>a</sup>

| [Buffer], M | [Nu] <sub>f</sub> , M     | k <sub>obs</sub> , s <sup>-1</sup> <sup>b</sup> |
|-------------|---------------------------|-------------------------------------------------|
| 0.00625     | 3.1250 × 10 <sup>-3</sup> | 0.199 ± 0.003                                   |
| 0.01250     | 6.2500 × 10 <sup>-3</sup> | 0.406 ± 0.006                                   |

|         |                         |               |
|---------|-------------------------|---------------|
| 0.01875 | 9.3750 10 <sup>-3</sup> | 0.627 ± 0.003 |
| 0.02500 | 0.0125                  | 0.98 ± 0.01   |
| 0.03125 | 0.0156                  | 1.241 ± 0.008 |
| 0.03750 | 0.0188                  | 1.47 ± 0.03   |
| 0.05000 | 0.0250                  | 1.76 ± 0.04   |

<sup>a</sup> Conditions: ionic strength = 0.1 M (KCl), [4W-*i*Pr] = 1.0 × 10<sup>-4</sup> M, pH = 9.39. <sup>b</sup> Determined with a stopped-flow machine monitoring at 436 nm.

**Table S23.** Reaction of 4W-*t*Bu with Glycinethylester in 50% MeCN- 50% water at 25 °C.<sup>a</sup>

| [Buffer], M | [Nu] <sub>f</sub> , M | <i>k</i> <sub>obs</sub> , s <sup>-1</sup> <sup>b</sup> |
|-------------|-----------------------|--------------------------------------------------------|
| 0.0125      | 0.00625               | 0.1799 ± 0.0002                                        |
| 0.0250      | 0.01250               | 0.5020 ± 0.0009                                        |
| 0.0375      | 0.01875               | 0.785 ± 0.002                                          |
| 0.0500      | 0.02500               | 1.313 ± 0.002                                          |
| 0.0625      | 0.03125               | 1.852 ± 0.002                                          |
| 0.0750      | 0.03750               | 2.50 ± 0.01                                            |
| 0.1000      | 0.05000               | 3.65 ± 0.03                                            |

<sup>a</sup> Conditions: ionic strength = 0.1 M (KCl), [4W-*t*Bu] = 1.0 × 10<sup>-4</sup> M, pH = 7.43. <sup>b</sup> Determined with a stopped-flow machine monitoring at 441 nm.

**Table S24.** Reaction of 4W-*t*Bu with Furfurylamine in 50% MeCN- 50% water at 25 °C.<sup>a</sup>

| [Buffer], M | [Nu] <sub>f</sub> , M | <i>k</i> <sub>obs</sub> , s <sup>-1</sup> <sup>b</sup> |
|-------------|-----------------------|--------------------------------------------------------|
| 0.0125      | 0.00625               | 0.706 ± 0.004                                          |
| 0.0250      | 0.01250               | 1.643 ± 0.006                                          |
| 0.0375      | 0.01875               | 2.508 ± 0.009                                          |
| 0.0500      | 0.02500               | 3.54 ± 0.01                                            |
| 0.0625      | 0.03125               | 4.417 ± 0.007                                          |
| 0.0750      | 0.03750               | 5.30 ± 0.04                                            |
| 0.1000      | 0.05000               | 6.91 ± 0.04                                            |

<sup>a</sup> Conditions: ionic strength = 0.1 M (KCl), [4W-*t*Bu] = 1.0 × 10<sup>-4</sup> M, pH = 8.58. <sup>b</sup> Determined with a stopped-flow machine monitoring at 441 nm.

**Table S25.** Reaction of 4W-*t*Bu with Benzylamine in 50% MeCN- 50% water at 25 °C.<sup>a</sup>

| [Buffer], M | [Nu] <sub>f</sub> , M | <i>k</i> <sub>obs</sub> , s <sup>-1</sup> <sup>b</sup> |
|-------------|-----------------------|--------------------------------------------------------|
|-------------|-----------------------|--------------------------------------------------------|

|        |         |                 |
|--------|---------|-----------------|
| 0.0125 | 0.00625 | 0.5249 ± 0.0004 |
| 0.0250 | 0.01250 | 1.13 ± 0.02     |
| 0.0375 | 0.01875 | 1.787 ± 0.006   |
| 0.0500 | 0.02500 | 2.329 ± 0.008   |
| 0.0625 | 0.03125 | 2.89 ± 0.02     |
| 0.0750 | 0.03750 | 3.34 ± 0.03     |
| 0.1000 | 0.05000 | 4.37 ± 0.05     |

<sup>a</sup> Conditions: ionic strength = 0.1 M (KCl), [4W-*t*Bu] = 1.0 × 10<sup>-4</sup> M, pH = 9.12. <sup>b</sup> Determined with a stopped-flow machine monitoring at 441 nm.

**Table S26.** Reaction of 4W-*t*Bu with Methoxyethylamine in 50% MeCN- 50% water at 25 °C.<sup>a</sup>

| [Buffer], M | [Nu] <sub>f</sub> , M   | <i>k</i> <sub>obs</sub> , s <sup>-1</sup> <sup>b</sup> |
|-------------|-------------------------|--------------------------------------------------------|
| 0.00625     | 3.1250 10 <sup>-3</sup> | 0.278 ± 0.006                                          |
| 0.01250     | 6.2500 10 <sup>-3</sup> | 0.609 ± 0.005                                          |
| 0.01875     | 9.3750 10 <sup>-3</sup> | 0.959 ± 0.005                                          |
| 0.02500     | 0.0125                  | 1.36 ± 0.01                                            |
| 0.03125     | 0.0156                  | 1.726 ± 0.009                                          |
| 0.03750     | 0.0188                  | 2.011 ± 0.002                                          |
| 0.05000     | 0.0250                  | 2.62 ± 0.04                                            |

<sup>a</sup> Conditions: ionic strength = 0.1 M (KCl), [4W-*t*Bu] = 1.0 × 10<sup>-4</sup> M, pH = 9.39. <sup>b</sup> Determined with a stopped-flow machine monitoring at 441 nm.

**Table S27.** Reaction of 4W-*t*Bu with Butylamine in 50% MeCN- 50% water at 25 °C.<sup>a</sup>

| [Buffer], M | [Nu] <sub>f</sub> , M | <i>k</i> <sub>obs</sub> , s <sup>-1</sup> <sup>b</sup> |
|-------------|-----------------------|--------------------------------------------------------|
| 0.0125      | 0.00625               | 0.073 ± 0.004                                          |
| 0.0250      | 0.01250               | 0.17 ± 0.02                                            |
| 0.0375      | 0.01875               | 0.19 ± 0.01                                            |
| 0.0500      | 0.02500               | 0.283 ± 0.008                                          |
| 0.0625      | 0.03125               | 0.38 ± 0.01                                            |
| 0.0750      | 0.03750               | 0.36 ± 0.01                                            |
| 0.1000      | 0.05000               | 0.59 ± 0.05                                            |

<sup>a</sup> Conditions: ionic strength = 0.1 M (KCl), [4W-*t*Bu] =  $1.0 \times 10^{-4}$  M, pH = 10.40. <sup>b</sup> Determined with a *stopped-flow* machine monitoring at 441 nm.

**Table S28.** Reaction of 4Cr-*c*Hex with Morpholine in 50% MeCN- 50% water at 25 °C.<sup>a</sup>

| [Buffer], M | [Morph] <sub>f</sub> , M | $k_{\text{obs}}$ , s <sup>-1</sup> <sup>b</sup> | $k_{\text{A corr}}$ , M <sup>-1</sup> s <sup>-1</sup> <sup>c</sup> |
|-------------|--------------------------|-------------------------------------------------|--------------------------------------------------------------------|
| 0.0125      | 0.007528                 | 0.00780 ± 0.00009                               | 0.14                                                               |
| 0.0250      | 0.015055                 | 0.0099 ± 0.0003                                 | 0.26                                                               |
| 0.0375      | 0.022582                 | 0.0148 ± 0.0002                                 | 0.46                                                               |
| 0.0500      | 0.030110                 | 0.0212 ± 0.0003                                 | 0.63                                                               |
| 0.0625      | 0.037638                 | 0.0349 ± 0.0003                                 | 0.99                                                               |
| 0.7500      | 0.045165                 | 0.0465 ± 0.0007                                 | 1.17                                                               |
| 0.1000      | 0.060220                 | 0.0699 ± 0.0006                                 | 1.40                                                               |

<sup>a</sup> Conditions: ionic strength = 0.1 M (KCl), [4Cr-*c*Hex] =  $1.0 \times 10^{-4}$  M, pH = 8.88. <sup>b</sup> Determined with a *stopped-flow* machine monitoring at 436 nm and 355 nm.

**Table S29.** Reaction of 4Cr-*c*Hex with Morpholine in 50% MeCN- 50% water at 25 °C varying the pH.<sup>a</sup>

| pH     | [HO <sup>-</sup> ], M | $k_{\text{obs}}$ , s <sup>-1</sup> | $k_{\text{A corr}}$ , M <sup>-1</sup> s <sup>-1</sup> |
|--------|-----------------------|------------------------------------|-------------------------------------------------------|
| 9.588  | $2.50 \times 10^{-6}$ | 0.02255 ± 0.00007                  | 9.06                                                  |
| 9.667  | $3.00 \times 10^{-6}$ | 0.02096 ± 0.00007                  | 9.45                                                  |
| 9.792  | $4.00 \times 10^{-6}$ | 0.0204 ± 0.0002                    | 11.23                                                 |
| 9.889  | $5.00 \times 10^{-6}$ | 0.02055 ± 0.00009                  | 13.38                                                 |
| 10.065 | $7.50 \times 10^{-6}$ | 0.0175 ± 0.0003                    | 15.83                                                 |
| 10.190 | $1.00 \times 10^{-5}$ | 0.0161 ± 0.0001                    | 18.67                                                 |
| 10.366 | $1.50 \times 10^{-5}$ | 0.0144 ± 0.0001                    | 24.05                                                 |
| 10.491 | $2.00 \times 10^{-5}$ | 0.01478 ± 0.00009                  | 32.24                                                 |
| 10.588 | $2.50 \times 10^{-5}$ | 0.0142 ± 0.0004                    | 38.24                                                 |

<sup>a</sup> Conditions: ionic strength = 0.1 M (KCl), [4Cr-*c*Hex] =  $1.0 \times 10^{-4}$  M, [morph] = 0.02 M and [TEA] = 0.01M. <sup>b</sup> Determined with a *stopped-flow* machine monitoring at 436 nm and 355 nm.

**Table S30.** Reaction of 4Cr-*c*Hex with Morpholine in 50% MeCN- 50% water at 25 °C varying the concentration of the external TEA buffer.<sup>a</sup>



| [TEA], M | $k_{\text{obs}}, \text{s}^{-1}$ | $k_{\text{A corr}}, \text{M}^{-1} \text{s}^{-1}$ |
|----------|---------------------------------|--------------------------------------------------|
| 0.001    | $0.0131 \pm 0.0002$             | 18.28                                            |
| 0.002    | $0.0140 \pm 0.0002$             | 19.54                                            |
| 0.003    | $0.0143 \pm 0.0001$             | 19.96                                            |
| 0.004    | $0.0152 \pm 0.0002$             | 21.22                                            |
| 0.005    | $0.01549 \pm 0.00007$           | 21.62                                            |
| 0.006    | $0.0162 \pm 0.0002$             | 22.61                                            |
| 0.007    | $0.01643 \pm 0.00009$           | 22.93                                            |
| 0.010    | $0.0164 \pm 0.0001$             | 22.89                                            |
| 0.015    | $0.0182 \pm 0.0001$             | 25.40                                            |
| 0.020    | $0.0197 \pm 0.0002$             | 27.50                                            |
| 0.025    | $0.02185 \pm 0.00009$           | 30.50                                            |
| 0.030    | $0.0229 \pm 0.0002$             | 31.96                                            |
| 0.035    | $0.0239 \pm 0.0002$             | 33.36                                            |

<sup>a</sup> Conditions: ionic strength = 0.1 M (KCl), [4Cr-cHex] =  $1.0 \times 10^{-4}$  M, [Morph] = 0.02 M, pH = 10.78. <sup>b</sup> Determined with a *stopped-flow* machine monitoring at 436 nm and 335 nm.

**Table S31.** Reaction of 4Cr-cHex with Butylamine in 50% MeCN- 50% water at 25 °C.<sup>a</sup>

| [Buffer], M | [Nu], M | $k_{\text{obs}}, \text{s}^{-1}$ <sup>b</sup> |
|-------------|---------|----------------------------------------------|
| 0.0125      | 0.00625 | $0.137 \pm 0.006$                            |
| 0.0250      | 0.01250 | $0.256 \pm 0.002$                            |
| 0.0375      | 0.01875 | $0.38 \pm 0.05$                              |
| 0.0500      | 0.02500 | $0.482 \pm 0.002$                            |
| 0.0625      | 0.03125 | $0.574 \pm 0.007$                            |
| 0.0750      | 0.03750 | $0.683 \pm 0.003$                            |
| 0.1000      | 0.05000 | $0.852 \pm 0.001$                            |

<sup>a</sup> Conditions: ionic strength = 0.1 M (KCl), [4Cr-cHex] =  $1.0 \times 10^{-4}$  M, pH = 10.40. <sup>b</sup> Determined with a *stopped-flow* machine monitoring at 436 nm.

**Table S32.** Reaction of 4Cr-cHex with Benzylamine in 50% MeCN- 50% water at 25 °C.<sup>a</sup>

| [Buffer], M | [Nu], M | $k_{\text{obs}}, \text{s}^{-1}$ <sup>b</sup> |
|-------------|---------|----------------------------------------------|
| 0.0125      | 0.00250 | $0.1513 \pm 0.0003$                          |
| 0.0250      | 0.00500 | $0.345 \pm 0.004$                            |

|        |         |               |
|--------|---------|---------------|
| 0.0375 | 0.01000 | 0.783 ± 0.003 |
| 0.0500 | 0.01500 | 1.268 ± 0.005 |
| 0.0625 | 0.02000 | 1.748 ± 0.008 |
| 0.0750 | 0.02500 | 2.27 ± 0.01   |
| 0.1000 | 0.03000 | 2.85 ± 0.02   |

<sup>a</sup> Conditions: ionic strength = 0.1 M (KCl), [4Cr-cHex] = 1.0 × 10<sup>-4</sup> M, pH = 9.12. <sup>b</sup> Determined with a stopped-flow machine monitoring at 436 nm.

**Table S33.** Reaction of 4Cr-cHex with Furfurylamine in 50% MeCN- 50% water at 25 °C.<sup>a</sup>

| [Buffer], M | [Nu], M | $k_{\text{obs}}, \text{s}^{-1}$ <sup>b</sup> |
|-------------|---------|----------------------------------------------|
| 0.0125      | 0.00625 | 0.2416 ± 0.0009                              |
| 0.0250      | 0.01250 | 0.683 ± 0.003                                |
| 0.0375      | 0.01875 | 1.120 ± 0.008                                |
| 0.0500      | 0.02500 | 1.580 ± 0.008                                |
| 0.0625      | 0.03125 | 2.17 ± 0.01                                  |
| 0.0750      | 0.03750 | 2.71 ± 0.02                                  |
| 0.1000      | 0.05000 | 3.61 ± 0.02                                  |

<sup>a</sup> Conditions: ionic strength = 0.1 M (KCl), [4Cr-cHex] = 1.0 × 10<sup>-4</sup> M, pH = 8.58. <sup>b</sup> Determined with a stopped-flow machine monitoring at 436 nm.

**Table S34.** Reaction of 4Cr-iPr with Butylamine in 50% MeCN- 50% water at 25 °C.<sup>a</sup>

| [Buffer], M | [Nu], M | $k_{\text{obs}}, \text{s}^{-1}$ <sup>b</sup> |
|-------------|---------|----------------------------------------------|
| 0.0125      | 0.00625 | 0.111 ± 0.002                                |
| 0.0250      | 0.01250 | 0.203 ± 0.002                                |
| 0.0375      | 0.01875 | 0.272 ± 0.003                                |
| 0.0500      | 0.02500 | 0.356 ± 0.001                                |
| 0.0625      | 0.03125 | 0.421 ± 0.001                                |
| 0.0750      | 0.03750 | 0.498 ± 0.003                                |
| 0.1000      | 0.05000 | 0.62 ± 0.01                                  |

<sup>a</sup> Conditions: ionic strength = 0.1 M (KCl), [4Cr-iPr] = 1.0 × 10<sup>-4</sup> M, pH = 10.40. <sup>b</sup> Determined with a stopped-flow machine monitoring at 451nm.

**Table S35.** Reaction of 4Cr-iPr with Furfurylamine in 50% MeCN- 50% water at 25 °C.<sup>a</sup>

| [Buffer], M | [Nu], M | $k_{\text{obs}}, \text{s}^{-1}{}^b$ |
|-------------|---------|-------------------------------------|
| 0.0125      | 0.00625 | $0.175 \pm 0.002$                   |
| 0.0250      | 0.01250 | $0.529 \pm 0.003$                   |
| 0.0375      | 0.01875 | $0.903 \pm 0.004$                   |
| 0.0500      | 0.02500 | $1.286 \pm 0.006$                   |
| 0.0625      | 0.03125 | $1.776 \pm 0.009$                   |
| 0.0750      | 0.03750 | $2.214 \pm 0.008$                   |
| 0.1000      | 0.05000 | $2.95 \pm 0.02$                     |

<sup>a</sup> Conditions: ionic strength = 0.1 M (KCl), [4Cr-*i*Pr] =  $1.0 \times 10^{-4}$  M, pH = 8.58. <sup>b</sup> Determined with a stopped-flow machine monitoring at 451nm.

**Table S36.** Reaction of 4Cr-*i*Pr with Benzylamine in 50% MeCN- 50% water at 25 °C.<sup>a</sup>

| [Buffer], M | [Nu], M | $k_{\text{obs}}, \text{s}^{-1}{}^b$ |
|-------------|---------|-------------------------------------|
| 0.0125      | 0.00250 | $0.1166 \pm 0.0006$                 |
| 0.0250      | 0.00500 | $0.282 \pm 0.001$                   |
| 0.0375      | 0.01000 | $0.621 \pm 0.005$                   |
| 0.0500      | 0.01500 | $0.987 \pm 0.005$                   |
| 0.0625      | 0.02000 | $1.321 \pm 0.009$                   |
| 0.0750      | 0.02500 | $1.704 \pm 0.008$                   |
| 0.1000      | 0.03000 | $2.14 \pm 0.01$                     |

<sup>a</sup> Conditions: ionic strength = 0.1 M (KCl), [4Cr-*i*Pr] =  $1.0 \times 10^{-4}$  M, pH = 9.12. <sup>b</sup> Determined with a stopped-flow machine monitoring at 451nm.

**Table S37.** Reaction of 4Cr-*t*Bu with Butylamine in 50% MeCN- 50% water at 25 °C.<sup>a</sup>

| [Buffer], M | [Nu], M | $k_{\text{obs}}, \text{s}^{-1}{}^b$ |
|-------------|---------|-------------------------------------|
| 0.0125      | 0.00625 | $0.0596 \pm 0.0006$                 |
| 0.0250      | 0.01250 | $0.110 \pm 0.002$                   |
| 0.0375      | 0.01875 | $0.154 \pm 0.002$                   |
| 0.0500      | 0.02500 | $0.204 \pm 0.004$                   |
| 0.0625      | 0.03125 | $0.244 \pm 0.002$                   |
| 0.0750      | 0.03750 | $0.29 \pm 0.01$                     |
| 0.1000      | 0.05000 | $0.367 \pm 0.006$                   |

<sup>a</sup> Conditions: ionic strength = 0.1 M (KCl), [4Cr-*t*Bu] =  $1.0 \times 10^{-4}$  M, pH = 10.40. <sup>b</sup> Determined with a stopped-flow machine monitoring at 457nm.

**Table S38.** Reaction of **4Cr-*t*Bu** with Furfurylamine in 50% MeCN- 50% water at 25 °C.<sup>a</sup>

| [Buffer], M | [Nu], M | $k_{\text{obs}}, \text{s}^{-1}$ <sup>b</sup> |
|-------------|---------|----------------------------------------------|
| 0.0125      | 0.00625 | 0.096 ± 0.001                                |
| 0.0250      | 0.01250 | 0.3217 ± 0.0005                              |
| 0.0375      | 0.01875 | 0.586 ± 0.001                                |
| 0.0500      | 0.02500 | 0.860 ± 0.004                                |
| 0.0625      | 0.03125 | 1.211 ± 0.006                                |
| 0.0750      | 0.03750 | 1.556 ± 0.008                                |
| 0.1000      | 0.05000 | 2.08 ± 0.02                                  |

<sup>a</sup> Conditions: ionic strength = 0.1 M (KCl), [4Cr-*t*Bu] =  $1.0 \times 10^{-4}$  M, pH = 8.58. <sup>b</sup> Determined with a stopped-flow machine monitoring at 457nm.

**Table S39.** Reaction of **4Cr-*t*Bu** with Benzylamine in 50% MeCN- 50% water at 25 °C.<sup>a</sup>

| [Buffer], M | [Nu], M | $k_{\text{obs}}, \text{s}^{-1}$ <sup>b</sup> |
|-------------|---------|----------------------------------------------|
| 0.0125      | 0.00250 | 0.0400 ± 0.0008                              |
| 0.0250      | 0.00500 | 0.129 ± 0.001                                |
| 0.0375      | 0.01000 | 0.348 ± 0.002                                |
| 0.0500      | 0.01500 | 0.583 ± 0.006                                |
| 0.0625      | 0.02000 | 0.843 ± 0.002                                |
| 0.0750      | 0.02500 | 1.1067 ± 0.0009                              |
| 0.1000      | 0.03000 | 1.40 ± 0.01                                  |

<sup>a</sup> Conditions: ionic strength = 0.1 M (KCl), [4Cr-*t*Bu] =  $1.0 \times 10^{-4}$  M, pH = 9.12. <sup>b</sup> Determined with a stopped-flow machine monitoring at 457nm.

**Table S40.** Reaction of **4Cr-*n*Bu** with Butylamine in 50% MeCN- 50% water at 25 °C.<sup>a</sup>

| [Buffer], M | [Nu], M | $k_{\text{obs}}, \text{s}^{-1}$ <sup>b</sup> |
|-------------|---------|----------------------------------------------|
| 0.0125      | 0.00625 | 0.127 ± 0.002                                |
| 0.0250      | 0.01250 | 0.232 ± 0.004                                |
| 0.0375      | 0.01875 | 0.34 ± 0.01                                  |
| 0.0500      | 0.02500 | 0.436 ± 0.006                                |
| 0.0625      | 0.03125 | 0.525 ± 0.002                                |
| 0.0750      | 0.03750 | 0.613 ± 0.003                                |

0.1000                                      0.05000                                      0.783 ± 0.005

<sup>a</sup> Conditions: ionic strength = 0.1 M (KCl), [4Cr-*n*Bu] = 1.0 × 10<sup>-4</sup> M, pH = 10.40. <sup>b</sup> Determined with a stopped-flow machine monitoring at 450 nm.

**Table S41.** Reaction of 4Cr-*n*Bu with Benzylamine in 50% MeCN- 50% water at 25 °C.<sup>a</sup>

| [Buffer], M | [Nu], M | $k_{\text{obs}}, \text{s}^{-1}$ <sup>b</sup> |
|-------------|---------|----------------------------------------------|
| 0.0125      | 0.00250 | 0.203 ± 0.0013                               |
| 0.0250      | 0.00500 | 0.471 ± 0.004                                |
| 0.0375      | 0.01000 | 0.975 ± 0.004                                |
| 0.0500      | 0.01500 | 1.50 ± 0.01                                  |
| 0.0625      | 0.02000 | 2.06 ± 0.01                                  |
| 0.0750      | 0.02500 | 2.613 ± 0.009                                |
| 0.1000      | 0.03000 | 3.22 ± 0.02                                  |

<sup>a</sup> Conditions: ionic strength = 0.1 M (KCl), [4Cr-*n*Bu] = 1.0 × 10<sup>-4</sup> M, pH = 9.12. <sup>b</sup> Determined with a stopped-flow machine monitoring at 450 nm.

**Table S42.** Reaction of 4Cr-*n*Bu with Furfurylamine in 50% MeCN- 50% water at 25 °C.<sup>a</sup>

| [Buffer], M | [Nu], M | $k_{\text{obs}}, \text{s}^{-1}$ <sup>b</sup> |
|-------------|---------|----------------------------------------------|
| 0.0125      | 0.00625 | 0.361 ± 0.005                                |
| 0.0250      | 0.01250 | 0.911 ± 0.004                                |
| 0.0375      | 0.01875 | 1.46 ± 0.01                                  |
| 0.0500      | 0.02500 | 2.03 ± 0.01                                  |
| 0.0625      | 0.03125 | 2.74 ± 0.02                                  |
| 0.0750      | 0.03750 | 3.38 ± 0.01                                  |
| 0.1000      | 0.05000 | 4.46 ± 0.02                                  |

<sup>a</sup> Conditions: ionic strength = 0.1 M (KCl), [4Cr-*n*Bu] = 1.0 × 10<sup>-4</sup> M, pH = 8.58. <sup>b</sup> Determined with a stopped-flow machine monitoring at 450 nm.
